## **Prevalence and global distribution of *bla*<sub>KPC-2</sub> and *bla*<sub>NDM-1</sub> genes in *Klebsiella Pneumoniae***

Xiufeng Zhang<sup>1,2,3</sup>, Fangping Li<sup>4</sup>, Lisha Mao<sup>5</sup>, Xiaohua Li<sup>4</sup>, Yixing Lu<sup>1,2,3</sup>,  
Awan Furqan<sup>1,2,3</sup>, Weibiao Lv<sup>6</sup>, Zhenling Zeng<sup>1,2,3</sup>

<sup>1</sup>Guangdong Provincial Key Laboratory of Veterinary Drugs Development and Safety Evaluation, South China Agricultural University, Guangzhou 510642, People's Republic of China

<sup>2</sup>National Laboratory of Safety Evaluation (Environmental Assessment) of Veterinary Drugs, South China Agricultural University, Guangzhou 510642, People's Republic of China

<sup>3</sup>National Risk Assessment Laboratory for Antimicrobial Resistance of Animal Original Bacteria, South China Agricultural University, Guangzhou 510642, People's Republic of China

<sup>4</sup>Guangdong Provincial Key Laboratory of Plant Molecular Breeding, State Key Laboratory for Conservation and Utilization of Subtropical Agro-Bioresources, South China Agricultural University, Guangzhou 510642, People's Republic of China

<sup>5</sup> Department of Clinical Laboratory, Cancer Hospital of Guangxi Medical University, Guangxi Medical University, Nanning, 530021, People's Republic of China

<sup>6</sup>Department of Clinical Laboratory, Shunde Hospital, Southern Medical University (The First People's Hospital of Shunde), Foshan 528000,

People's Republic of China

Correspondence: Weibiao Lv and Zhenling Zeng

Email: [weibiao2004@163.com](mailto:weibiao2004@163.com) and [zlzeng@scau.edu.cn](mailto:zlzeng@scau.edu.cn)

## Abstract

Carbapene-resistant *Klebsiella pneumoniae* infections have caused a major concern and posed a global health threat to public. *bla*<sub>KPC-2</sub> and *bla*<sub>NDM-1</sub> genes are the most widely reported of carbapenem resistance genes in *K. pneumoniae*. In this study, we investigated phylogenetic relationships of carbapene-resistant *K. pneumoniae* from a tertiary hospital between 2013 and 2018 in China and analyzed the global epidemiology and distribution of *bla*<sub>KPC-2</sub> and *bla*<sub>NDM-1</sub> gene in *K. pneumoniae* based on 1579 NGS genomes. We found that 19 carbapene-resistant *K. pneumoniae* isolated were divided into five lineages and all had high genotypic and phenotypic resistance. Two lineages (mostly ST11 and ST25) were the major type detected carrying *bla*<sub>KPC-2</sub> and *bla*<sub>NDM-1</sub> gene, respectively. Among global genomes data, 147 known ST types have been identified and ST11 and ST258 were the globally prevalent clones. Genetic environment analysis showed that the *ISKpn27-bla*<sub>KPC-2</sub>-*ISKpn6* and *bla*<sub>NDM-1</sub>-*ble-trpf-nagA* may be the core structure in the horizontal transfer of *bla*<sub>KPC-2</sub> and *bla*<sub>NDM-1</sub>, respectively. In addition, DNA transferase (*hin*) may be involved in the horizontal transfer or the expression of *bla*<sub>NDM-1</sub>. This study sheds some light on the

genetic environment of *bla*<sub>KPC-2</sub> and *bla*<sub>NDM-1</sub> and should foster further studies about the mechanism of carbapene-resistant *K. pneumoniae* dissemination.

**Key word:** *Klebsiella pneumoniae*, *bla*<sub>KPC-2</sub>, *bla*<sub>NDM-1</sub>, Bioinformatics

## Introduction

*Klebsiella pneumoniae*, as a member of ESKAPE pathogens, is the most common factor of nosocomial infections. Infections caused by *K. pneumoniae* are associated with a high risk of mortality and increased economic costs. In recent years, *K. pneumoniae* has been considered as a growing global threat due to its high level of resistance, particularly to those last resort antibiotics, such as carbapenems<sup>[1]</sup>. In 2014, carbapenem-resistant *K. pneumoniae* (CRKP) has been listed in the critical priority tier by WHO and became a major threat to public health<sup>[2]</sup>.

Carbapenem resistance in *K. pneumoniae* involves multiple mechanisms, including the production of carbapenemases, alterations in outer membrane permeability and the upregulation of efflux systems. The latter two mechanisms are often combined with high levels of other types of  $\beta$ -lactamases (e.g., AmpC, ESBLs)<sup>[3]</sup>. Carbapenemases are carbapenem hydrolyzing  $\beta$ -lactamases and the most popular carbapenemases are ambler molecular class A (KPC), class B (VIM, IMP, NDM) and class D (OXA-48-like) types among *K. pneumoniae*<sup>[4-5]</sup>.

The KPC-type  $\beta$ -lactamases have been almost exclusively reported in *K.*

*pneumonia*. Even though there are more than 20 different KPC variants reported<sup>[6]</sup>, KPC-2 and -3 remain the most commonly identified variants<sup>[7]</sup>. The class B  $\beta$ -lactamases identified in *K. pneumonia* have been identified in various enterobacterial species and worldwide<sup>[4]</sup>. The majority of NDM-1-producing *K. pneumonia* strains also carry a diversity of other resistance mechanisms but remain mostly susceptible to agents such as colistin, fosfomycin, and tigecycline.<sup>[5,8]</sup> The class D OXA-48-producing *K. pneumoniae* is endemic in Turkey and certain North African and European countries, and shows a wide range of susceptibility profiles. These different carbapenemase genes circulating within *K. pneumoniae* are often carried by mobile structures, including insertion sequences (IS), plasmids and transposons, and therefore cause a significant public health concern<sup>[5]</sup>.

Nosocomial outbreaks caused by CRKP have been rapidly emerging in many countries and they are more often found in critically ill patients dwelling in intensive care units (ICU)<sup>[9]</sup>. Extensive genotypic characterization has shown that clusters of highly similar *K. pneumoniae* occur, representative of distinct clonal lineages<sup>[10-11]</sup> and there are several high-risk clones or ST types reported for the global distribution of CRKP. To date, the pandemic of KPC-producing *K. pneumoniae* is driven primarily by the spread of clonal complex 258 (CC258) isolates<sup>[6]</sup>. CC258 consists of the predominant clone ST258 and its single-locus variants

(ST11, ST340 and ST512)<sup>[6,12]</sup>. Previous study indicated that *K. pneumoniae* ST11 is an emerging high-risk clone that is associated with *bla<sub>KPC</sub>*<sup>[10]</sup>, ST14, ST25 and ST340 with *bla<sub>NDM-1</sub>* have been reported widely<sup>[13]</sup>.

Recently, carbapenem-resistant hypervirulent *K pneumoniae* strains have been reported and caused a substantial threat to human health because they are simultaneously hypervirulent, multidrug resistant, and highly transmissible<sup>[14]</sup>. Hence, it is of great significance to carry out molecular mechanism research and epidemiological investigation on carbapenem resistance genes among *K. pneumonia* in the world. With the development of sequence technology, there were *K. pneumonia* genomes available in the GenBank databases. It is possible to study the evolution and epidemiology of carbapenem resistance in this *K. pneumonia* pathogen.

In this study, we conducted a six-year-long longitudinal study of a tertiary care hospital in China, to study the time dynamics of carbapenem-resistant *K. pneumoniae* and presence of carbapenem resistance genes *bla<sub>kPC-2</sub>* and *bla<sub>NDM-1</sub>* on healthcare surfaces using next generation sequencing (NGS) and bioinformatic analyses. In addition, we combine the NGS *K. pneumoniae* data from the GenBank databases to demonstrate the *K. pneumoniae* distribution characteristics in the world, and to analyze the global distribution and gene structure characteristics of

genes *bla<sub>kPC-2</sub>* and *bla<sub>NDM-1</sub>*. The study aims to provide theoretical basis for the rational use of clinical antibiotics and the reduction of the outbreak of nosocomial infection.

## **Materials and methods**

### **Strains collection and Antimicrobial susceptibility**

CRKP isolates were collected from Shunde hospital in China between 2013 and 2018. For all isolates, the minimum inhibitory concentrations (MICs) of antibiotics were determined using a BD Phoenix™ 100 Automated Identification and Susceptibility Testing system (BD, USA) according to CLSI and EUCAST guideline<sup>[15]</sup>.

### **Illumina Whole Genome Sequencing**

Bacterial genomic DNA of CRKP strains were extracted using a HiPure Bacterial DNA Kit (MAGEN). The libraries were created using the VAHTSTM Universal DNA Library Prep kit for Illumina. Whole genome sequencing was carried out on an Illumina HiSeq 2500 system to obtain 2×150 bp reads. Processed reads were de novo assembled into contigs with CLC Genomics Workbench 10.1 (CLC Bio, Aarhus, Denmark) and the genomes were annotated by NCBI Prokaryotic Annotation Pipeline (PGAP).

### **Global data gathering**

Data from the national center of biological information (NCBI) and its open database (<https://www.ncbi.nlm.nih.gov/assembly>), we used

conventional python scripts to screen samples with complete information for further analysis. A total of 1579 samples from 44 countries, including 247 fully assembled level samples and 1332 scaffold level samples, were gathered to subsequent analysis.

### **Taxonomic assignment and ARG, VG, IS identification**

FastANI v1.1 (<https://github.com/ParBLiSS/FastANI>) with the core algorithm of BLAST-based ANI solver was used to identify the species of all isolates<sup>[16-17]</sup>. Genome ASM24018v2

(<https://www.ncbi.nlm.nih.gov/search/all/?term=%20ASM24018v2%20>) was used as *K. pneumoniae* reference genome for species identification.

Species were determined if the genome in question had >95% ANIb and all the isolates from hospital have >98% ANIb compared with reference genome<sup>[18]</sup>. Software MLST v2.16.1 was used to perform multi-site

sequence typing (MLST) on sample genome<sup>[19]</sup>. ResFinder BLAST

identification program(<https://cge.cbs.dtu.dk/services/ResFinder/>) and

Isfinder were used to identify acquired antibiotic resistance genes (ARGs)

and mobile elements, respectively<sup>[20]</sup>. VFDB (<http://www.mgc.ac.cn/VFs/>)

virulence database (setB) was conducted for bacterial virulence genes analysis.

### **Clustering and Pan-genome analysis**

Prokka v1.14 was used to produce gff file for the contig of *K.*

*pneumoniae* genome we collected<sup>[21]</sup>. After that, core genome alignment

were constructed with Roary v3.8.0 and PRANK v1.0<sup>[22]</sup>.

Core\_genome\_alignment.aln, the output file of Roary pipeline was

conveyed to fastGEAR to identify Lineages by hierBAPS<sup>[23]</sup>.

### ***Bla*<sub>KPC-2</sub> and *bla*<sub>NDM-1</sub> loci annotation and comparison**

Regular Python scripts and Easyfigv2.2.3 (<http://easyfig.sourceforge.net/>)

used in the gene sequence extracted for environment analysis.

Seventy-six *K. pneumoniae* genomes and thirty *K. pneumoniae* genomes

with complete chromosomal genomic data were selected for *bla*<sub>KPC-2</sub> and

*bla*<sub>NDM-1</sub> gene environment analysis, respectively. Through python script,

we extracted the upstream and downstream 2~6 kb sequences of the

target gene for blast alignment and annotation.

### **Visualization of drug resistance and global distribution**

ArcGIS 10.3, R package ggplot2 (<http://had.co.nz/ggplot2>), package

pheatmap (<https://stat.ethz.ch/pipermail/r-help/2012-November/>

330785.html) and conventional Python scripts were used for visualizing

analysis.

### **Nucleotide Accession Number**

These assemblies sequence data of CRKP isolated from hospital were

deposited in the GenBank database under BioProject accession

PRJNA564463.

## **Results**

### **CRKP isolates had high genotypic and phenotypic resistance**



A total of 19 CRKP strains were isolated from Shunde hospital. All isolates resulted multi-resistant phenotypes and carried 29 unique ARGs for 8 different classes of antibiotics. All strains were sensitive to polymyxins and tigecycline (figure.1(b)). 94.7% of these ARGs were  $\beta$ -lactamases and *bla<sub>SHV</sub>*, *bla<sub>NDM-1</sub>*, *bla<sub>TEM-1B</sub>*, *bla<sub>OXA-1</sub>*, *bla<sub>KPC-2</sub>* were the most prevalent for carbapenemase-encoding genes.

### **Two lineages dominated CRKP populations**

MLST typing showed that CRKP isolates were divided into four ST types and three untyped ST. Most isolates belonged to ST25 and ST11 sequence types, while two isolates were assigned to ST105 and ST1212, respectively. We further identified lineages with fastGEAR/BAPS and found that CRKP contained five BAPS lineages with ST11 and ST25 relating to lineages 4 and 5, respectively. The lineage 4 and lineage 5 represented >78% of all isolates and the differences between lineages were consistent with ST types and time collections (Figure.1(a)).

In addition, all ST11 strains harbored *bla<sub>KPC-2</sub>*, whereas *bla<sub>NDM-1</sub>* was found in ST25, ST105 and 3 unknown ST type samples (Figure.1 (a) (c)).

Hierarchical clustering of isolates based on ARG presence or phenotypic susceptibility indicated lineage was the major predictor of resistance-based clustering patterns (Figure.1 (b) (c)).

### **Geographical genetic distribution characteristics of *K. pneumoniae***

Through MLST classification of 1579 NGS data from NCBI, a total of

147 known ST types were identified and unknown ST types are found in 384 samples. Among all the known ST type samples, the distribution of epidemic ST varies by counties. Results showed that ST11 (282/1195) and ST258 (264/1195) were dominated, followed by ST15, ST512, ST147 and ST231. In addition, ST11 and ST258 were dominant in China (52%) and the United States (54%), respectively.

Then we detect the presence of *bla*<sub>KPC-2</sub> and *bla*<sub>NDM-1</sub> gene in 1579 NGS genomes and found 462 genomes carried *bla*<sub>KPC-2</sub> gene and 106 had *bla*<sub>NDM-1</sub> gene, respectively. Gene *bla*<sub>KPC-2</sub> was most detected in ST11(88.2%), ST45(80.0%) and ST437 (66.7%) (Figure.3(a)), while *bla*<sub>NDM-1</sub> most found in ST1(66.7%), ST14(53.8%)(Figure.3(a)(c)). Besides, only four genomes contained both genes and they were all isolated from China with three ST11 isolates and one ST86 strain.

Among the dominant ST type, we found 88% of ST11 *K. pneumoniae* contained *bla*<sub>KPC-2</sub> and 4% had *bla*<sub>NDM-1</sub>. Whereas in ST258 *K. pneumoniae*, only 28% of genomes carried *bla*<sub>KPC-2</sub> gene and none of them contained *bla*<sub>NDM-1</sub>. The presence of *bla*<sub>KPC-2</sub> and *bla*<sub>NDM-1</sub> gene in China (9% and 62%) was significantly higher than those in the United States (2% and 18%) (Figure.2).

### **Gene environments of *bla*<sub>KPC-2</sub> and *bla*<sub>NDM-1</sub>**

Seventy-six *K. pneumoniae* genomes and thirty *K. pneumoniae* genomes with complete chromosomal genomic data were put into *bla*<sub>KPC-2</sub> and

*bla<sub>NDM-1</sub>* gene environment analysis, respectively. For the *bla<sub>KPC-2</sub>* gene, we found 97% (74/76) of *bla<sub>KPC-2</sub>* gene were located on the plasmid. And *bla<sub>KPC-2</sub>* gene is often linked to mobile component *ISKpn6* and *ISKpn27*, where *ISKpn6* is often located in *bla<sub>KPC-2</sub>* gene 3', and *ISKpn27* often located in *bla<sub>KPC-2</sub>* gene 5', including those strains belong to ST11 and ST258. While *ISKpn7* was detected in *bla<sub>KPC-2</sub>* gene 5' in the chromosome of ST258 sample from the United States. However, in ST11 samples from China, the *IS26* family transposon *Tn3 (tnpR)* is often detected in the gene environment of *bla<sub>KPC-2</sub>*. In addition, aminoglycoside antibiotic resistance gene *accA4* was detected in the *bla<sub>KPC-2</sub>* gene environment of ST258 samples from the United States (Figure.4(a))

As shown in the Figure.4(b), we found that *bla<sub>NDM-1</sub>* gene was all located on plasmids of all genomes. Gene *bla<sub>NDM-1</sub>* is often linked to *ble*, *trpF* and *nagA* encoding genes for bleomycin resistance protein. In most samples, the *bla<sub>NDM-1</sub>* gene environment contained *IS30* family mobile elements such as *ISAba125*. Besides, in the ST11 genome from Norway, *IS630* family mobile element *ISSpu2* and DNA transferase (*hin*) encoding gene fragments were detected in 5' of *bla<sub>NDM-1</sub>* gene, while in ST16 genome from Thailand, two DNA transferase (*hin*) encoding gene fragments were detected in 5' of *bla<sub>NDM-1</sub>* gene. In addition, multiple antibiotic resistance genes were detected in the *bla<sub>NDM-1</sub>* gene environment, such as the

tetracycline resistance gene (*tet*) and aminoglycoside antibiotic resistance gene (*aph*).

## Discussion

*K. pneumoniae* is responsible for human infections and patient population is the most important reservoir in high-frequency nosocomial *K. pneumoniae* outbreaks. The emergence of *K. pneumoniae* carrying carbapenemases and their worldwide dissemination represent significant public health crisis. As carbapenem resistance *bla*<sub>KPC-2</sub> and *bla*<sub>NDM-1</sub> are the most widely reported among CRKP worldwide, we used genomic and phylogenetic approaches to analyze CRKP isolated from hospital in China and uncover the distribution of these two genes in global genomes from GeneBank of NCBI.

Our findings indicate that the CRKP population is highly diverse, encompassing five lineages and various STs. All these CRKP isolates had high AEG burdens and were only sensitive to polymyxins and tigecycline, which means resistance in CRKP is more and more serious<sup>[24-25]</sup>. In particular, ST11 CRKP have been associated with the global dissemination of *K. pneumoniae*, all the ST types found in hospital were also widely reported in China<sup>[10]</sup>. Interestingly, through core genome phylogenetic analysis, there was no significant genetic difference in the core genome except the sample P38, which indicated there is high homology between samples in different time of the hospitals. Hence,

based on the actual collection time of the samples (at least in different months of the same year), we can infer that there are certain nosocomial infections and clonal transmission in the time segment of the hospital.

MLST typing results showed that ST11-CRKP (5 in 19 strains) in the hospital carried *bla*<sub>KPC-2</sub>. However, according to the genotyping results of GeneBank genome data, 88.25% of ST11 strains contained *bla*<sub>KPC-2</sub> and 4.5% carried *bla*<sub>NDM-1</sub>. Considering the number of samples, these two values are at a relatively high level compared with other ST types. The results of our analysis and previous studies showed that the dominant type of *K. pneumoniae* in China is ST11, which is consistent with previous studies<sup>[10]</sup>. This type of *K. pneumoniae* isolate has obvious preference for carrying *bla*<sub>KPC-2</sub> and *bla*<sub>NDM-1</sub>, which also has geographical differences. Considering the sample size, the proportion of isolates in China carrying the two major carbapenem resistance genes, especially the proportion of *bla*<sub>KPC-2</sub> gene, is at a relatively high level in the world. This also means that isolates prevalent in China are more likely to develop pan-carbapenem drug resistance<sup>[26]</sup>.

In addition, *bla*<sub>KPC-2</sub> gene was found in ST45, ST307 and ST437 isolates of ST-type *K. pneumoniae*, among which ST437 was the dominant ST-type in Brazil. In general, these three ST types of *K. pneumoniae* were widely distributed in the global scope and had no obvious locality, so it was worth exploring the underlying isolate mobility problem.

Besides, co-occurrence of *bla*<sub>NDM-1</sub> and *bla*<sub>KPC-2</sub> in a clinical isolate of *K. pneumoniae* was considered to result in very broad-spectrum antibiotic resistance profiles<sup>[27]</sup>. Previous studies have found this phenomenon in India, South Africa, and China<sup>[27-31]</sup>. In our analysis, the strains with co-expression characteristics selected were all from China, which indicated that the detection of multi-drug resistant bacteria in China is relatively adequate, and also indicated that the abuse of antibiotics in China is serious and worthy of vigilance. In addition, all ST25 samples isolated (9 isolates) in our study carried *bla*<sub>NDM-1</sub>. This preference has not been previously reported and is worth further exploration.

It was noted that through genetic analysis we found that the resistant gene *bla*<sub>KPC-2</sub> and adjacent mobile component always form *Tn3-ISKpn27-bla*<sub>KPC-2</sub> -*ISKpn6* chain or *ISKpn6- bla*<sub>KPC-2</sub> -*ISKpn27-IS26*, which were called *Tn1722*-based unit transposon and *IS26*-based composite transposon in previous studies, respectively<sup>[32-34]</sup>. This phenomenon means that the core structure *ISKpn27-bla*<sub>KPC-2</sub> -*ISKpn6* of the plasmid is likely to carry *bla*<sub>KPC-2</sub> to transfer in the global scope. In addition, the presence of *bla*<sub>KPC-2</sub> on plasmids was more common in earlier reports, but our study showed that *bla*<sub>KPC-2</sub> in some isolate was located on the chromosome genome, and one of the *bla*<sub>KPC-2</sub> isolates carried *ISKpn7* instead of *ISKpn27* in the core structure. However, the insertion sequence *ISKpn6* and *ISKpn7* were often reported in transposon

*Tn4401*<sup>[5,35]</sup>, which was the main genetic structure enhancing the spread of the *bla*<sub>KPC</sub>-type genes onto different plasmid scaffolds. In addition, the presence of a variety of carbapenem resistance genes was detected in the *bla*<sub>KPC-2</sub> environment of ST11 samples from China. The interaction between these carbapenem resistance genes and *bla*<sub>KPC-2</sub> and the influence on the drug resistance phenotype are worth further investigation.

Besides, we found that there were *ISAbal25*, isomerase *trpF*, *ISSen4* and family elements in the environment of *bla*<sub>NDM-1</sub> in some isolates, and the upstream and downstream of *bla*<sub>NDM-1</sub> gene often contained transposons (*Tn3*) or inserted sequence fragments (*IS30*), which often involved in horizontal transfer of the drug-resistant gene<sup>[36]</sup>. In most *bla*<sub>NDM-1</sub> samples, *ble*, *trpF* and *nagA* are closely linked<sup>[37]</sup> downstream, so it can be considered that *bla*<sub>NDM-1</sub>-*ble*-*trpF*-*nagA* may be the core structure of horizontal transfer of *bla*<sub>NDM-1</sub><sup>[12,36]</sup>.

DNA transferase (*hin*) is a special recombinant binding enzyme that can promote the inversion of DNA position and thus control the alternating expression of proteins and participate in the specific recombination of bacteria<sup>[38]</sup>, which has been reported to be involved in the inversion control of DNA segment H in the flagellum phase of *Salmonella enterica*. The presence of this type of gene in the upstream environment of some *bla*<sub>NDM-1</sub> sample hint that it may be involved in the horizontal transfer or expression control of *bla*<sub>NDM-1</sub>.

## Conclusion

In this study, we found all CRKP strains had high ARG and antibiotic burdens and belonged to the dominant ST25 and ST11. Phylogenetic analysis showed that there was clonal transmission of CRKP in the hospital. Bioinformatic analysis of 1597 NCBI samples revealed that ST11 and ST258 were the most detected clones and both ST types had a preference for carrying *bla*<sub>KPC-2</sub> gene. The core structure of *ISKpn27-bla*<sub>KPC-2</sub>-*ISKpn6* and *bla*<sub>NDM-1</sub>-*ble-trpF-nagA* is highly epidemic in KPC- and NDM-1-producing *K. pneumoniae*. In addition, DNA transferase (*hin*) may play an important role in the horizontal transfer or expression of *bla*<sub>NDM-1</sub> and needed to be further studied. Our study provides a complete genetic background and geographical distribution for further understanding the transmission mode and mechanism of *bla*<sub>KPC-2</sub> and *bla*<sub>NDM-1</sub>.



## **Conflict of interests**

All authors declare that they have no conflict of interest.

## **Authors' contributions**

The number one author contributed the same as the number two author

## **Acknowledgments**

This work was supported by the National Natural Science Foundation of China (Grant No. 31672608) and the National College Students Innovation And Entrepreneurship Foundation of China (201910564054).

## References:

- [1] Hamidian M and Nigro S J. Emergence, molecular mechanisms and global spread of carbapenem-resistant *Acinetobacter baumannii*. *Microbial Genomics*, 2019, 5(10).
- [2] Organization W H. Antimicrobial resistance: 2014 global report on surveillance., 2014.
- [3] Nordmann P and Mammeri H. Extended-spectrum cephalosporinases: structure, detection and epidemiology. *FUTURE MICROBIOL*, 2007, 2(3): 297~307.
- [4] Nordmann P, Naas T and Poirel L. Global spread of Carbapenemase-producing Enterobacteriaceae. *Emerging Infect. Dis.*, 2011, 17(10): 1791~1798.
- [5] Pitout J D D, Nordmann P and Poirel L. Carbapenemase-Producing *Klebsiella pneumoniae*, a Key Pathogen Set for Global Nosocomial Dominance. *ANTIMICROB AGENTS CH*, 2015, 59(10): 5873~5884.
- [6] Munoz-Price L S, Poirel L, Bonomo R A, Schwaber M J, Daikos G L, Cormican M, Cornaglia G, Garau J, Gniadkowski M, Hayden M K, Kumarasamy K, Livermore D M, Maya J J, Nordmann P, Patel J B, Paterson D L, Pitout J, Villegas M V, Wang H, Woodford N and Quinn J P. Clinical epidemiology of the global expansion of *Klebsiella pneumoniae* carbapenemases. *The Lancet Infectious Diseases*, 2013, 13(9): 785~796.
- [7] Walther-Rasmussen J and Høiby N. Class A carbapenemases. *J ANTIMICROB CHEMOTH*, 2007, 60(3): 470~482.
- [8] Nordmann P and Poirel L. The difficult-to-control spread of carbapenemase producers among Enterobacteriaceae worldwide. *CLIN MICROBIOL INFECTION*, 2014, 20(9): 821~830.
- [9] van Duijn P, Dautzenberg M and Oostdijk E. Recent trends in antibiotic resistance in European ICUs. *CURR OPIN CRIT CARE*, 2011, 17(6): 658~665.
- [10] Qi Y, Wei Z, Ji S, Du X, Shen P and Yu Y. ST11, the dominant clone of KPC-producing *Klebsiella pneumoniae* in China. *J ANTIMICROB CHEMOTH*, 2011, 66(2): 307~312.
- [11] Adler A, Khabra E, Chmelnitsky I, Giakkoupi P, Vatopoulos A, Mathers A, Yeh A, Sifri C, De Angelis G, Tacconelli E, Villegas M, Quinn J and Carmeli Y. Development and validation of a multiplex PCR assay for identification of the epidemic ST-258/512 KPC-producing *Klebsiella pneumoniae* clone. *Diagn. Microbiol. Infect. Dis.*, 2014, 78(1): 12~15.
- [12] Chen L, Mathema B, Chavda K D, DeLeo F R, Bonomo R A and Kreiswirth B N. Carbapenemase-producing *Klebsiella pneumoniae*: molecular and genetic decoding. *TRENDS MICROBIOL*, 2014, 22(12): 686~696.
- [13] Poirel L, Dortet L, Bernabeu S and Nordmann P. Genetic features of blaNDM-1-positive Enterobacteriaceae. *Antimicrob. Agents Chemother.*, 2011, 55(11): 5403~5407.
- [14] Yao H, Qin S, Chen S, Shen J and Du X D. Emergence of carbapenem-resistant hypervirulent *Klebsiella pneumoniae*. *LANCET INFECT DIS*, 2017, 18(1).
- [15] Pfaller M A, Castanheira M, Diekema D J, Messer S A, Moet G J and Jones R N. Comparison of European Committee on Antimicrobial Susceptibility Testing (EUCAST) and Etest Methods with the CLSI Broth Microdilution Method for Echinocandin Susceptibility Testing of *Candida* Species. *J CLIN MICROBIOL*, 2010, 48(5): 1592~1599.
- [16] Klappenbach J A, Goris J, Vandamme P, Coenye T, Konstantinidis K T and Tiedje J M. DNA - DNA hybridization values and their relationship to whole-genome sequence

- similarities. *INT J SYST EVOL MICR*, 2007, 57(1): 81~91.
- [17] Rodriguez-R L M and Konstantinidis K T. Bypassing Cultivation To Identify Bacterial Species. *Microbe: the news magazine of the American Society for Microbiology*, 2014, 9(3): 111~118.
- [18] D Souza A W, Potter R F, Wallace M, Shupe A, Patel S, Sun X, Gul D, Kwon J H, Andleeb S, Burnham C D and Dantas G. Spatiotemporal dynamics of multidrug resistant bacteria on intensive care unit surfaces. *NAT COMMUN*, 2019, 10(1).
- [19] Maiden M C J, van Rensburg M J J, Bray J E, Earle S G, Ford S A, Jolley K A and McCarthy N D. MLST revisited: the gene-by-gene approach to bacterial genomics. *NAT REV MICROBIOL*, 2013, 11(10): 728~736.
- [20] Kichenaradja P, Siguier P, Pérochon J and Chandler M. ISbrowser: an extension of ISfinder for visualizing insertion sequences in prokaryotic genomes. *NUCLEIC ACIDS RES*, 2010, 38(suppl\_1): D62~D68.
- [21] Seemann T. Prokka: rapid prokaryotic genome annotation. *BIOINFORMATICS*, 2014, 30(14): 2068~2069.
- [22] Page A J, Cummins C A, Hunt M, Wong V K, Reuter S, Holden M T G, Fookes M, Falush D, Keane J A and Parkhill J. Roary: rapid large-scale prokaryote pan genome analysis. *BIOINFORMATICS*, 2015, 31(22): 3691~3693.
- [23] R M, NJ C, CP A, J C, WP H and P M. Efficient Inference of Recent and Ancestral Recombination within Bacterial Populations. *MOL BIOL EVOL*, 2017, 34(5): 1167~1182.
- [24] Gheitani L, Fazeli H, Moghim S and Nasr I B. Frequency Determination of Carbapenem-Resistant *Klebsiella Pneumoniae* (CRKP) Isolated from hospitals in Isfahan of Iran and Evaluation of Synergistic Effect of Colistin and Meropenem on them, 2018: 70~74.
- [25] Dong F, Zhang Y, Yao K, Lu J and Liu G. Epidemiology of Carbapenem-Resistant *Klebsiella pneumoniae* Bloodstream Infections in a Chinese Children's Hospital: Predominance of New Delhi Metallo- $\beta$ -Lactamase-1. *MICROB DRUG RESIST*, 2017, 24(2).
- [26] C Jingrong, Y U Yue, C Diandian, W Yan, M Rong and W Peichang. The analysis of resistance and homology for carbapenem resistant *Klebsiella pneumoniae*. *Laboratory Medicine and Clinic*, 2017, 14(23): 3438~3440, 3443.
- [27] Kumarasamy K and Kalyanasundaram A. Emergence of *Klebsiella pneumoniae* isolate co-producing NDM-1 with KPC-2 from India. *J ANTIMICROB CHEMOTH*, 2011, 67(1): 243~244.
- [28] Paul D, Dhar Chanda D, Maurya A P, Mishra S, Chakravarty A, Sharma G D and Bhattacharjee A. Co-Carriage of blaKPC-2 and blaNDM-1 in Clinical Isolates of *Pseudomonas aeruginosa* Associated with Hospital Infections from India. *PLOS ONE*, 2015, 10(12): e145823.
- [29] Brink A J, Coetzee J, Clay C G, Sithole S, Richards G A, Poirel L and Nordmann P. Emergence of New Delhi Metallo-Beta-Lactamase (NDM-1) and *Klebsiella pneumoniae* Carbapenemase (KPC-2) in South Africa. *J CLIN MICROBIOL*, 2012, 50(2): 525~527.
- [30] Wei D D, Wan L G and Liu Y. Draft Genome Sequence of an NDM-1- and KPC-2-Coproducing Hypervirulent Carbapenem-Resistant *Klebsiella pneumoniae* Strain Isolated from Burn Wound Infections. *Genome Announc*, 2018, 6(13).
- [31] Wang J, Yao X, Luo J, Lv L, Zeng Z and Liu J. Emergence of *Escherichia coli* co-producing

- NDM-1 and KPC-2 carbapenemases from a retail vegetable, China. *J ANTIMICROB CHEMOTH*, 2018, 73(1): 252~254.
- [32] Wang L, Fang H, Feng J, Yin Z, Xie X, Zhu X, Wang J, Chen W, Yang R, Du H and Zhou D. Complete sequences of KPC-2-encoding plasmid p628-KPC and CTX-M-55-encoding p628-CTXM coexisted in *Klebsiella pneumoniae*. *FRONT MICROBIOL*, 2015, 6.
- [33] Li G, Zhang Y, Bi D, Shen P, Ai F, Liu H, Tian Y, Ma Y, Wang B, Rajakumar K, Ou H and Jiang X. First Report of a Clinical, Multidrug-Resistant Enterobacteriaceae Isolate Coharboring Fosfomycin Resistance Gene *fosA3* and Carbapenemase Gene *blaKPC-2* on the Same Transposon, Tn1721. *ANTIMICROB AGENTS CH*, 2014, 59(1): 338~343.
- [34] Chen Y T, Lin J C, Fung C P, Lu P L, Chuang Y C, Wu T L and Siu L K. KPC-2-encoding plasmids from *Escherichia coli* and *Klebsiella pneumoniae* in Taiwan. *J ANTIMICROB CHEMOTH*, 2014, 69(3): 628~631.
- [35] Cuzon G, Naas T and Nordmann P. Functional Characterization of Tn4401, a Tn3 -Based Transposon Involved in *blaKPC* Gene Mobilization. *ANTIMICROB AGENTS CH*, 2011, 55(11): 5370~5373.
- [36] Patrice N, Laurent P, Timothy R W and David M L. The emerging NDM carbapenemases. *TRENDS MICROBIOL*, 2011, 19(12).
- [37] Kutsukake K, Nakashima H, Tominaga A and Abo T. Two DNA Invertases Contribute to Flagellar Phase Variation in *Salmonella enterica* Serovar Typhimurium Strain LT2. *J BACTERIOL*, 2007, 188(3): 950~957.
- [38] Feng J, Johnson R and Dickerson R. Hin recombinase bound to DNA: the origin of specificity in major and minor groove interactions. *SCIENCE*, 1996, 263(5145): 348~355.

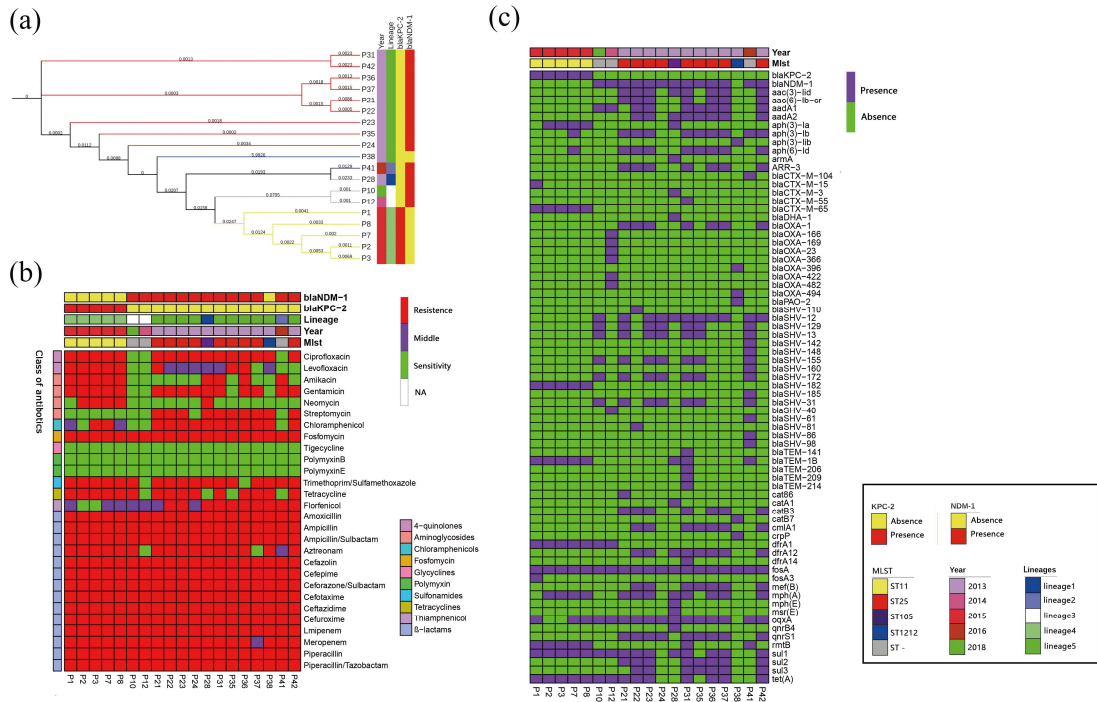

**Fig.1** Results of phylogenetic trees, bayesian classification, MIC test and ARGs identification of 19 samples from ICU rooms. Sampling time, lineages of hierBAPS, presence/absence of *blaKPC-2* and *blaNDM-1* are annotated as colored bars next to the isolate number. (a) Phylogenetic trees of high abundance species from core genome alignments. Maximum likelihood phylogenetic trees from core genome alignments; Tree branches are colored by MLST types. (b) Results of MIC test; class of antibiotics and resistance strength are annotated as colored bars next to the main heatmap. (c) Results of ARGs identification; presence/absence of ARGs are annotated as colored bars next to the main heatmap.

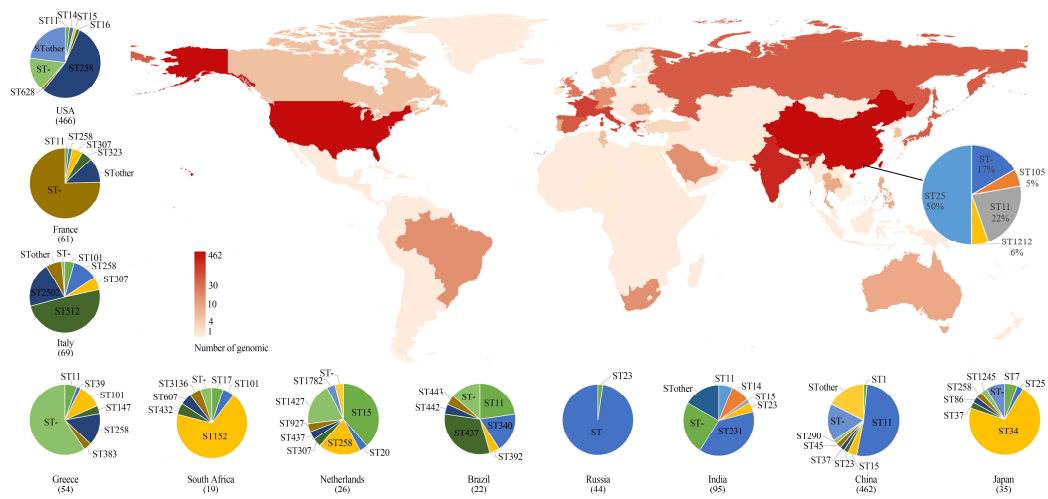

**Fig.2** Geographic distribution and MLST typing results of *K. pneumoniae* samples in different countries and regions of genomic samples from NCBI and Shunde hospital; The color shades on the map represent the number of samples. The pie chart link with black line to China on the main map represents the MLST typing results of samples from Shunde hospital. The pie chart next to the main map represent MLST typing results of 13 countries.

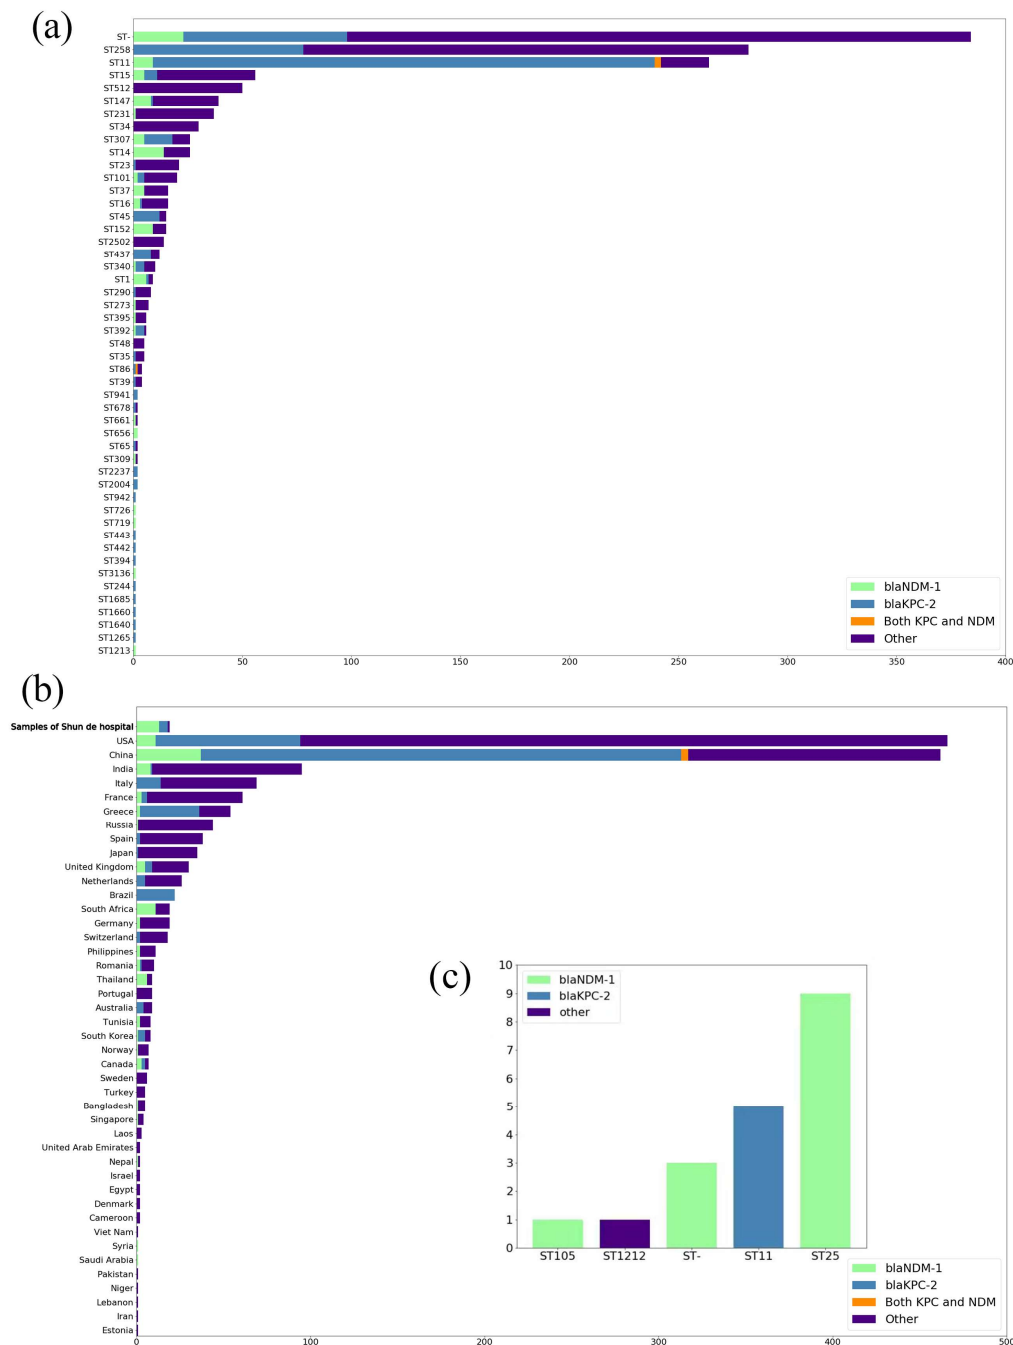

**Fig.3** Distribution of *K. pneumoniae* and carbapenem resistance genes (CRGs) (*blaKPC-2* and *blaNDM-1*); Types of (CRGs) are annotated by different colors. All STs are based on the Pubmlst MLST scheme. (a) Distribution of carbapenem resistance genes of CRGs in *K. pneumoniae* genomes from NCBI in the ST type with large abundance or with *blaKPC-2* or *blaNDM-1* for display. (b) Geographical distribution of CRGs in *K. pneumoniae* genomes from NCBI (only countries with  $\geq 1$  CRG-containing genome are shown). Countries are shown on the y-axis and the numbers on x-axis indicate the number of CRGs. (c) Distribution of carbapenem resistance genes of CRGs in *K. pneumoniae* genomes from Shunde hospital.

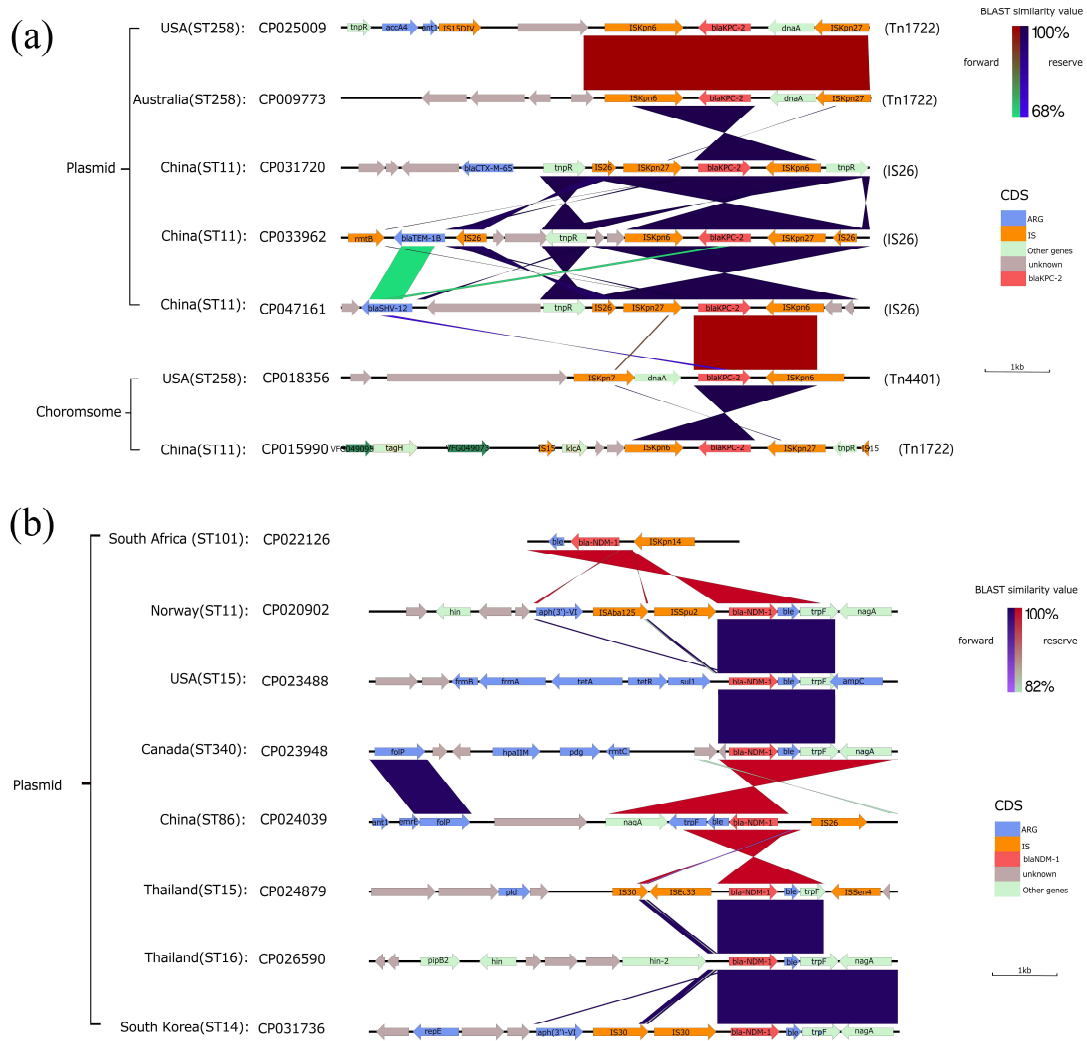

**Fig.4** *bla*<sub>KPC-2</sub> and *bla*<sub>NDM-1</sub> gene environment and comparison of some representative samples; BLAST similarity values and the types of different CDS are annotated by different colors next to main chart (a) Gene environment of *bla*<sub>KPC-2</sub> (b) Gene environment of *bla*<sub>NDM-1</sub>
